# Supplementary material
Source: Springer Nature journal article supplement (https://www.springermedizin.de/resource/supplementary/12875_2009_385_MOESM2_ESM.pdf/9434502)
Supplement: MOESM2 [file 9434502]

## **Problems experienced**

**Making  
adequate decisions**

## **Strategy used**

**Supporting close observation  
and follow-up by the district  
nurse and others**

## **Objective**

**Adequate decisions**
